# Supplementary material for: Utilization of General and Specialized Cardiac Care by People With Schizophrenia
Source: Atypon-hosted journal article supplement (doi:10.1176/appi.ps.201000363), 2012-02-02
Supplement: pss6303_0237_ds1.pdf [file pss6303_0237_ds1.pdf]

## **Appendix A: Identification of Coronary Artery Disease and Revascularization**

### **Acute Coronary Syndrome<sup>1</sup>**

From Discharge Abstracts Database

- Acute MI : ICD-9-CM of 410.X; ICD-10-CA of 121.X – 122.X
- Unstable Angina: ICD-9-CM of 411.X, 413.X; ICD-10-CA of 120.X, 124.X

### **Prior MI, Ischemic Heart Disease, and Arrhythmia**

From Discharge Abstracts Database, Alberta Physician Claims Data, Ambulatory Care Classification System

- Prior MI: ICD-9-CM of 412.X, ICD-10-CA of 125.2
- Ischemic Heart Disease: ICD-9-CM of 414; ICD-10-CA of 125.1, 125.5, 125.6, 125.8, 125.9
- Arrhythmia: ICD-9-CM of 426.X – 427.X; ICD-10-CA of 147.X – 149.X

### **Procedures<sup>1</sup>**

From Alberta Physician Claims Data

- Percutaneous Coronary Intervention (PCI): 51.59A, 51.59C, 51.59D, 51.59E, 51.59F
- Coronary Artery Bypass Graft (CABG): 48.12, 48.12A, 48.13, 48.13A, 48.14, 48.14A, 48.15A, 48.15B, 48.15C, 48.15D, 48.15E, 48.15F

### **References**

1. Alberta Diabetes Surveillance System Alberta Diabetes Atlas 2007.

2. Curkendall SM, Mo J, Glasser DB, Stang MR, Jones JK. Cardiovascular disease in patients with schizophrenia in Saskatchewan, Canada. *J Clin Psychiatry* 2004;65:715-720.
