# Supplementary figures and images for: Utilization of General and Specialized Cardiac Care by People With Schizophrenia
Source: Atypon-hosted journal article supplement (doi:10.1176/appi.ps.201000363), 2012-02-02

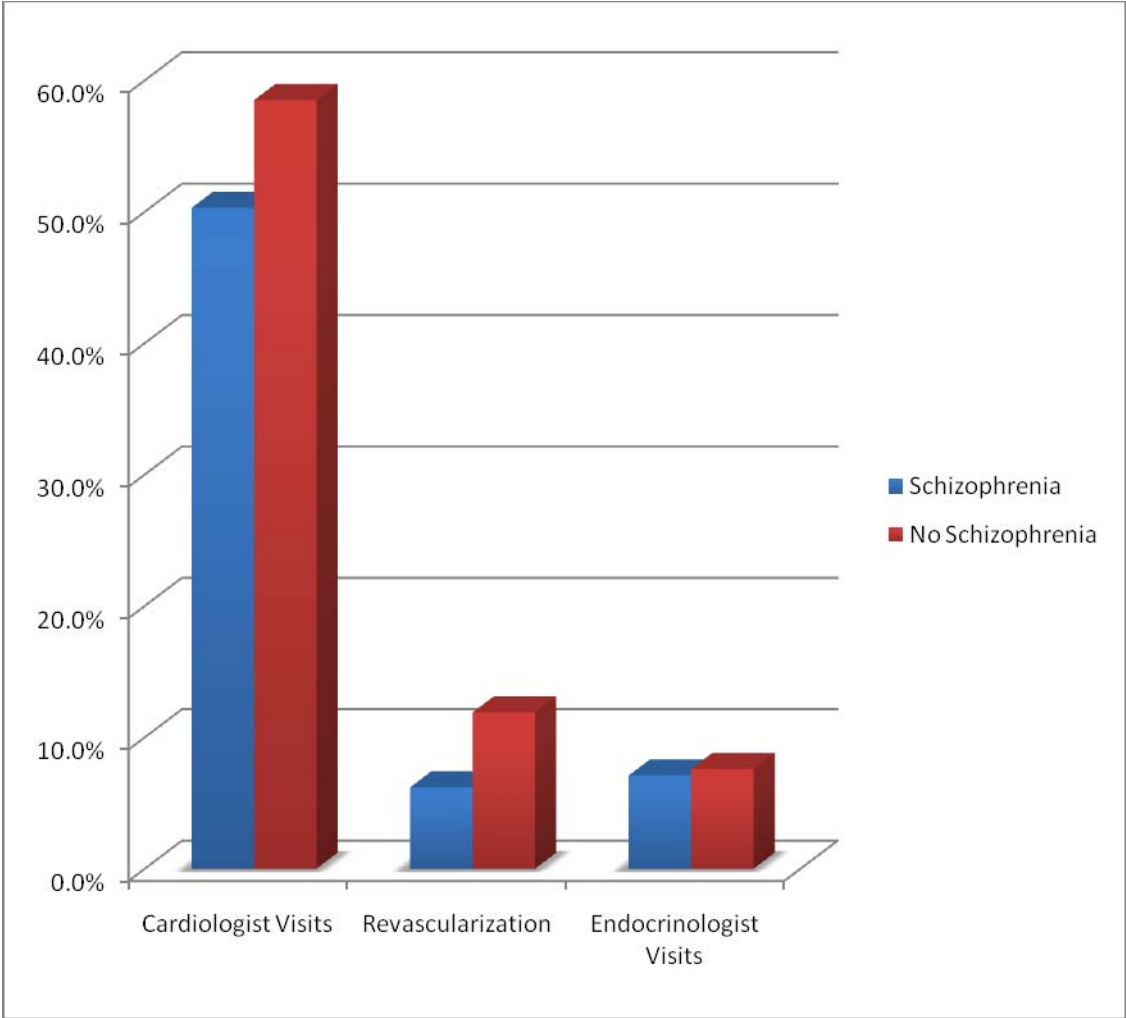

Supplement: pss6303_0237_ds2.pdf [file pss6303_0237_ds2.pdf]
